# Supplementary material for: Coordination polymers constructed from tetrahedral-shaped adamantane tectons
Source: Royal Society of Chemistry journal article supplement (doi:10.1039/c6ce02146h), 2016-11-30
Supplement: c6ce02146h1.pdf [file c6ce02146h1.pdf]

## SUPPORTING INFORMATION

### **Coordination polymers constructed from tetrahedral shaped adamantane tectons**

**Teodora Mocanu,<sup>a</sup> Lidia Pop,<sup>b</sup> Niculina D. Hădade,<sup>b</sup> Sergiu Shova,<sup>c</sup> Ion Grosu,<sup>b,\*</sup> Marius Andruh<sup>a,\*</sup>**

<sup>a</sup> *Inorganic Chemistry Laboratory, Faculty of Chemistry, University of Bucharest, Str. Dumbrova Rosie nr. 23, 020464, Bucharest, Romania*

<sup>b</sup> *Centre of Supramolecular Organic and Organometallic Chemistry (CCSOOM), Department of Chemistry, Faculty of Chemistry and Chemical Engineering, Babeş-Bolyai University, 11 Arany Janos, 400028, Cluj-Napoca, Romania*

<sup>c</sup> *“Petru Poni” Institute of Macromolecular Chemistry, Aleea Grigore Ghica Voda, 41A, 700487 Iasi, Romania*

### **Experimental Section**

#### *Materials*

All reagents and solvents, purchased from commercial sources, were used as received, without any further purification.

## 1. Experimental procedures

### Synthesis of 1,3,5,7- tetrakis{4-(4-pyridyl)phenyl}adamantane (**L**<sup>1</sup>)

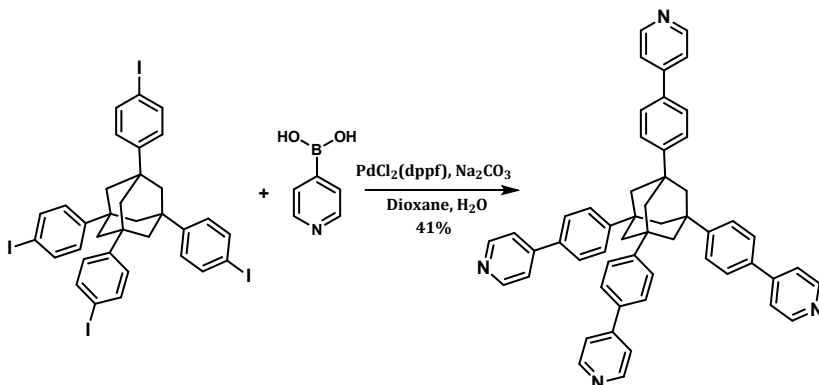

Scheme S1

### Synthesis of 1,3,5,7- tetrakis(4-cyano-phenyl)adamantane (**L**<sup>2</sup>)

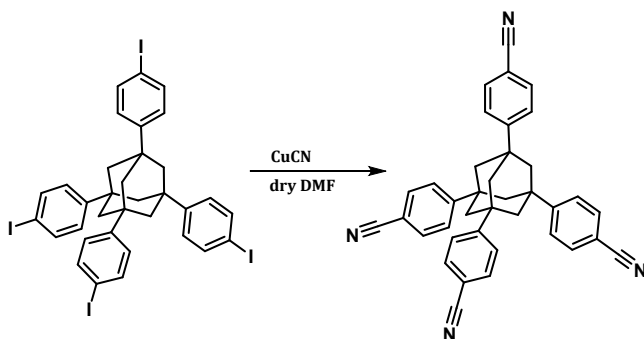

Scheme S2

## 2. Physical measurements

### 2.1. Crystallographic data collection and structure determination

The X-ray diffraction measurements were performed on Oxford Diffraction SuperNova diffractometer using hi-flux micro-focus Nova Cu K $\alpha$  radiation (for compound **1**) and on a STOE IPDS II single crystal diffractometer, using graphite-monochromated Mo K $\alpha$  radiation ( $\lambda = 0.71073 \text{ \AA}$ ) (for compound **2**). The structures were solved by direct methods and refined by full-matrix least-squares techniques based on  $F^2$  using the SHELXL-2013 program package.<sup>S1</sup> The non-H atoms were refined with anisotropic displacement parameters. Hydrogen atoms were placed in fixed, idealized positions and refined as rigidly bonded to the corresponding carbon atoms. Since attempts to locate and refine the positional parameters for disordered entities in the crystal structure of **1** were not fully successful, the “solvent mask routine” available in the

Olex2<sup>S2</sup> program was used to account for the scattering from the voids accommodating out-of-sphere BF<sub>4</sub><sup>-</sup> anions and H<sub>2</sub>O molecules. As the result, the value of  $R_{1\text{obs}}$  has been reduced from 0.1033 to 0.0750. Crystallographic data and structure refinement parameters for **1** and **2** are presented in Table S1. Selected bond distances and angles are collected in Table S2.

CCDC reference number: 1508551-1508552

**Table S1.** Crystallographic data, details of data collection and structure refinement parameters for **1** and **2**.

|                                                                        | <b>1</b>                                                                                                         | <b>2</b>                                                                        |
|------------------------------------------------------------------------|------------------------------------------------------------------------------------------------------------------|---------------------------------------------------------------------------------|
| Formula sum                                                            | C <sub>54</sub> H <sub>48</sub> CuB <sub>2</sub> F <sub>8</sub> N <sub>4</sub> O <sub>2</sub> ·8H <sub>2</sub> O | C <sub>29</sub> H <sub>16</sub> MnF <sub>12</sub> N <sub>2</sub> O <sub>4</sub> |
| Formula weight                                                         | 1166.26                                                                                                          | 739.38                                                                          |
| Crystal system                                                         | tetragonal                                                                                                       | tetragonal                                                                      |
| Space group                                                            | <i>I</i> 422                                                                                                     | <i>I</i> 4 <sub>1</sub> / <i>a</i>                                              |
| <i>a</i> /Å                                                            | 12.8199(9)                                                                                                       | 11.645(5)                                                                       |
| <i>b</i> /Å                                                            | 12.8199(9)                                                                                                       | 11.645(5)                                                                       |
| <i>c</i> /Å                                                            | 32.617(4)                                                                                                        | 52.700(5)                                                                       |
| $\alpha$ /°                                                            | 90.000                                                                                                           | 90.000(5)                                                                       |
| $\beta$ /°                                                             | 90.000                                                                                                           | 90.000(5)                                                                       |
| $\gamma$ /°                                                            | 90.000                                                                                                           | 90.000(5)                                                                       |
| <i>V</i> /Å <sup>3</sup>                                               | 5360.5(1)                                                                                                        | 7146(6)                                                                         |
| <i>Z</i>                                                               | 4                                                                                                                | 8                                                                               |
| <i>D<sub>c</sub></i> /g cm <sup>-3</sup>                               | 1.310                                                                                                            | 1.374                                                                           |
| T/K                                                                    | 293                                                                                                              | 293                                                                             |
| $\mu$ /mm <sup>-1</sup>                                                | 1.218                                                                                                            | 0.465                                                                           |
| Reflections collected                                                  | 6049                                                                                                             | 32305                                                                           |
| Independent reflection                                                 | 1932 [ $R_{\text{int}} = 0.0566$ ]                                                                               | 3122 [ $R_{\text{int}} = 0.2541$ ]                                              |
| $R_1^a$ [ $I > 2\sigma(I)$ ]                                           | 0.0750                                                                                                           | 0.0604                                                                          |
| $wR_2^b$ (all data)                                                    | 0.2671                                                                                                           | 0.1807                                                                          |
| GOF                                                                    | 1.086                                                                                                            | 0.885                                                                           |
| $\Delta\rho_{\text{min}}/\Delta\rho_{\text{max}}$ (e Å <sup>-3</sup> ) | -0.24/1.26                                                                                                       | -0.25/0.53                                                                      |
| Flack parameter                                                        | 0.42(7)                                                                                                          |                                                                                 |

<sup>a</sup> $R_1 = \sum ||F_o| - |F_c|| / \sum |F_o|$ . <sup>b</sup> $wR_2 = [\sum w(F_o^2 - F_c^2)^2 / \sum w(F_o^2)^2]^{1/2}$ ;  $w = 1/[\sigma^2(F_o^2) + (aP)^2 + bP]$  where  $P = [\max(F_o^2, 0) + 2F_c^2]/3$ .

**Tables S2.** Bond lengths (Å) and angles (deg) for **1** and **2**

| <b>1</b>                            |           | <b>2</b>                            |          |
|-------------------------------------|-----------|-------------------------------------|----------|
| Cu1–N1                              | 2.026(8)  | Mn1 – O1                            | 2.128(4) |
| Cu1–O1W                             | 2.626(16) | Mn1– O2                             | 2.156(5) |
|                                     |           | Mn1 – N1                            | 2.241(7) |
| O1W Cu1 O1W <sup>A</sup>            | 180.0     | O1 Mn1 O2                           | 83.2(2)  |
| O1W Cu1 N1                          | 90.0(5)   | O1 Mn1 O2 <sup>A</sup>              | 94.8(2)  |
| O1W Cu1 N1 <sup>A</sup>             | 90.0(5)   | O1 Mn1 O1 <sup>A</sup>              | 177.3(3) |
| O1W Cu1 N1 <sup>B</sup>             | 90.0(5)   | O1 Mn1 N1                           | 94.1(2)  |
| O1W Cu1 N1 <sup>C</sup>             | 90.0(5)   | O1 Mn1 N1 <sup>A</sup>              | 87.8(2)  |
| N1 Cu1 N1 <sup>A</sup>              | 89.5(4)   | O2 Mn1 O1 <sup>A</sup>              | 94.8(2)  |
| N1 Cu1 N1 <sup>B</sup>              | 180.0(1)  | O2 Mn1 O2 <sup>A</sup>              | 88.7(3)  |
| N1 Cu1 N1 <sup>C</sup>              | 90.5(4)   | O2 Mn1 N1                           | 176.9(2) |
| N1 <sup>A</sup> Cu1 N1 <sup>B</sup> | 90.5(4)   | O2 Mn1 N1 <sup>A</sup>              | 90.0(2)  |
| N1 <sup>A</sup> Cu1 N1 <sup>C</sup> | 180.0(1)  | O1 <sup>A</sup> Mn1 O2 <sup>A</sup> | 83.2(2)  |
| N1 <sup>B</sup> Cu1 N1 <sup>C</sup> | 89.5(4)   | O1 <sup>A</sup> Mn1 N1              | 87.8(2)  |
|                                     |           | O1 <sup>A</sup> Mn1 N1 <sup>A</sup> | 94.1(2)  |
|                                     |           | O2 <sup>A</sup> Mn1 N1              | 90.0(2)  |
|                                     |           | O2 <sup>A</sup> Mn1 N1 <sup>A</sup> | 176.9(2) |
|                                     |           | N1 Mn1 N1 <sup>A</sup>              | 91.4(4)  |

  

|                                                               |                                                       |
|---------------------------------------------------------------|-------------------------------------------------------|
| <sup>A</sup> = 1- <i>x</i> , 2- <i>y</i> , <i>z</i>           | <sup>A</sup> = 1- <i>x</i> , 0.5- <i>y</i> , <i>z</i> |
| <sup>B</sup> = 1.5- <i>x</i> , 1.5- <i>y</i> , 0.5- <i>z</i>  |                                                       |
| <sup>C</sup> = 0.5+ <i>x</i> , -0.5+ <i>y</i> , 0.5- <i>z</i> |                                                       |

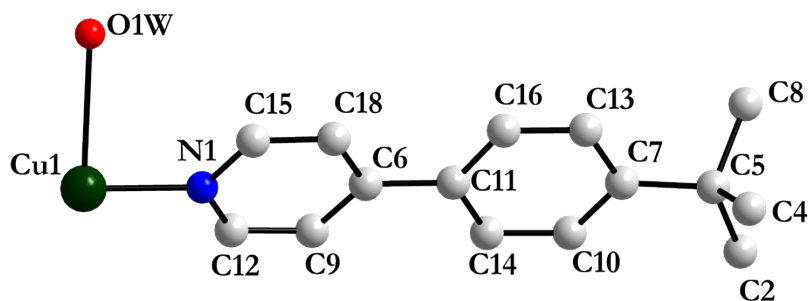

**Figure S1.** The asymmetric unit of compound **1**.

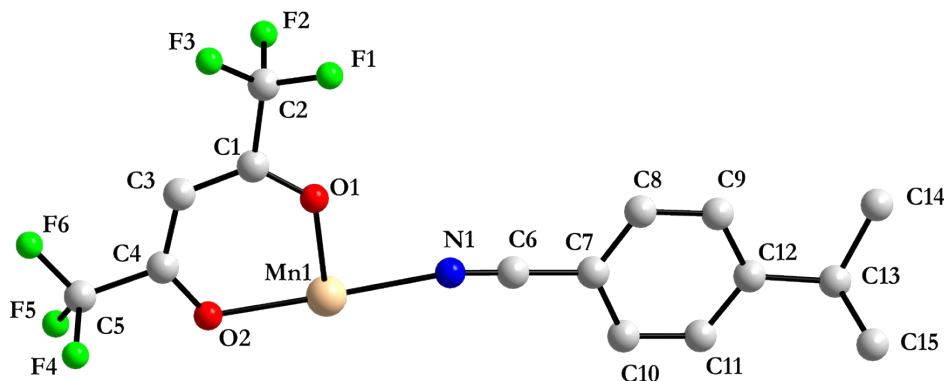

**Figure S2.** The asymmetric unit of compound **2**.

## Comments on checkcif report

### Compound 1

*All tested crystals were small and of poor quality. They exhibit extremely weak diffraction and the resolution of the collected X-ray data (for the best crystal) has been estimated to be 0.9 Å. Nevertheless the structure could be solved and successfully refined.*

The A type alerts pointed out by the IUCr's *checkCIF* service are reported and commented:

### Compound 2

1) RINTA01\_ALERT\_3\_A The value of Rint is greater than 0.25 Rint given 0.254

*The crystals diffracted poorly, due to the small size. Several data collections were performed on different single crystals and the best one is reported herein.*

2) PLAT601\_ALERT\_2\_A Structure Contains Solvent Accessible VOIDS of 449 Å<sup>3</sup>

*Compound 2 crystallizes from a mixture of dichloromethane and n-heptane. When removed from the mother liquor the crystals remain clear in the air for several days. The solvent molecules must have left the crystals leaving the voids.*

S1. (a) G.M. Sheldrick, *Acta Cryst.*, 2015, **A71**, 3; (b) G.M. Sheldrick, *Acta Cryst.*, 2015, **C71**, 3;

S2. O.V. Dolomanov, L.J. Bourhis, R.J. Gildea, J.A.K. Howard and H. Puschmann, *J. Appl. Cryst.*, 2009, **42**, 339.

## 2.2. Diffuse reflectance spectra

Diffuse reflectance spectra were performed on a JASCO V-670 spectrophotometer, using MgO as standards (Figure S3). **1**: 281, 321, 604 nm

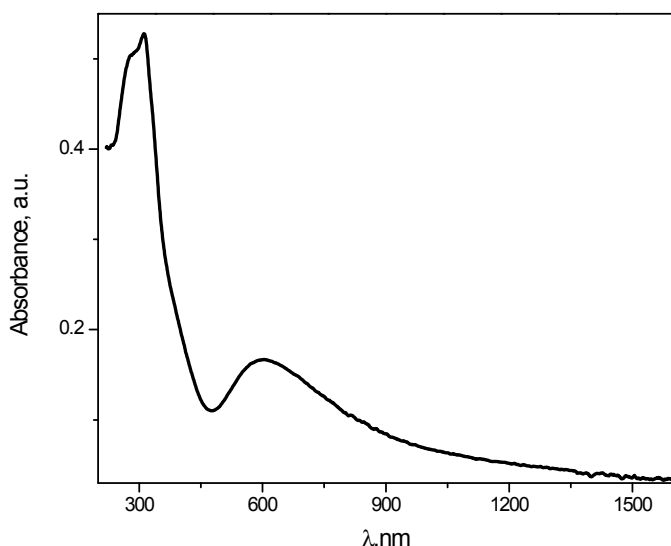

**Figure S3.** Diffuse reflectance spectrum of compound **1**.

## 2.3. Elemental and thermogravimetric analyses

Elemental analysis was carried out on a EuroEa Elemental Analyser.

**1**  $C_{54}H_{64}CuB_2F_8N_4O_{10}$ : C, 55.61; H, 5.53; N, 4.80 % (calcd.); C, 54.93; H, 5.40; N, 4.90 %. (found)

**2**  $C_{29}H_{16}MnF_{12}N_2O_4$ : C, 47.11; H, 2.18; N, 3.79 % (calcd.); C, 48.01; H, 2.07; N, 3.26 % (found).

Thermogravimetric analysis was performed on a TA Q500 TGA instrument using platinum pan in nitrogen atmosphere. The heating rate was  $5^{\circ}\text{C min}^{-1}$  from room temperature ( $25^{\circ}\text{C}$ ) to  $100^{\circ}\text{C}$  and  $10^{\circ}\text{C min}^{-1}$  from 100 to  $600^{\circ}\text{C}$ .

The final formula of compound **1**,  $[\text{CuL}^1(\text{H}_2\text{O})_2](\text{BF}_4)_2 \cdot 8\text{H}_2\text{O}$ , was established using the TGA and elemental analysis data. The TGA curve reveals that the dehydration of compound **1** starts at temperatures below  $50^{\circ}\text{C}$  and it continues in multiple stages until the complete dehydration is reached around  $245^{\circ}\text{C}$ . The weight loss of 15.5% at  $245^{\circ}\text{C}$  can be assigned to ten water

molecules per formula unit, meaning eight crystallization water molecules. These values are in good agreement with the elemental analysis data.

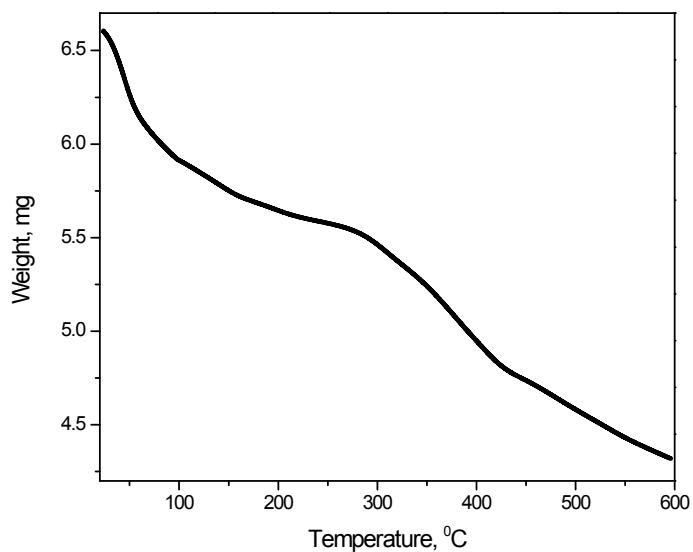

**Figure S4.** Thermogravimetric analysis for compound **1**.

#### *2.4. X-ray powder diffraction*

X-ray powder diffraction data were recorded on Proto diffractometer at 298 K.

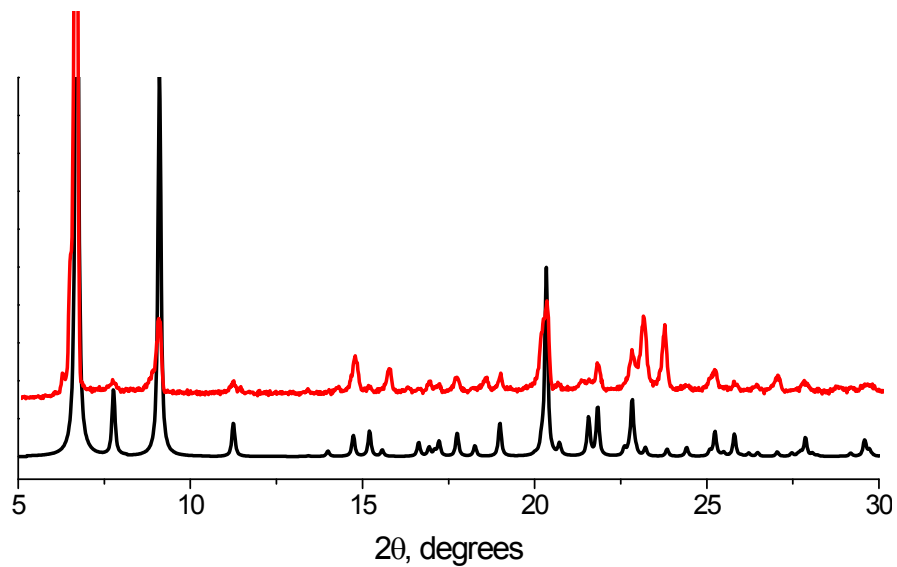

**Figure S5.** Simulated (black) and experimental (red) PXRD pattern for compound **2**.
